# Supplementary material for: Concise syntheses of bacteriohopanetetrol and its glucosamine derivative
Source: Royal Society of Chemistry journal article supplement (doi:10.1039/b504558d), 2005-01-01
Supplement: b504558d.pdf [file b504558d.pdf]

## Electronic Supplementary Information

### I. Coupling of bromide 8 and epoxide 4.

THF was distilled over Na and benzophenone. Glass syringes were used and magnetic bars were glass-coated. A CaCl<sub>2</sub> trap was placed between the argon source and the reaction flasks. Purity of starting bromide **8** was assessed by elemental analysis before any series of experiments. All other reactants were purchased from Aldrich or Acros without further purification.

**Lithium 2-thienyl-cyanocuprate (Solution A):** To a solution of thiophene (199  $\mu$ L, 2.44 mmol) in dry THF (5 mL) under an argon atmosphere, was added <sup>n</sup>BuLi (2.5 M in hexane, 0.95 mL, 2.4 mmol) dropwise *via* a syringe at -78°C. Stirring was continued at this temperature for 15 min, then at -20°C for 30 min. The solution was transferred, *via* a cannula, into a suspension of CuCN (218.6 mg, 2.44 mmol) and dry THF (1 mL) at -78°C. Then, the mixture was warmed to -40°C to give a clear, light-tan solution.

**Lithium naphthalene (Solution B):** To freshly prepared Li<sup>o</sup> (26 mg, 3.6 mmol) and naphthalene (312.7 mg, 2.44 mmol), under argon, was added freshly distilled THF (8 mL). The flask was then clamped in an ultrasonic bath, at a position of maximum energy and the irradiation was continued for 5 min at room temperature to afford a bottle-green solution. The reaction mixture was stirred for another 1h at room temperature to give a dark green solution.

**Coupling reaction:** Lithium naphthalene (Solution B) was transferred into the above freshly prepared lithium 2-thienylcyanocuprate (Solution A) at -78°C *via* a syringe, dropwise over a period of 20 min. Then, the stirring was continued for 30 min at -78°C. A solution of bromohopane **8** (270 mg, 0.549 mmol) in freshly distilled THF (6 mL, containing 0.2 eq. LiDBB), under argon, was added *via* a syringe at -78°C over a period of 10 min. A solution of epoxide **4** (2.8 eq.) in freshly distilled THF (2 mL, containing 0.2 eq. LiDBB) was added, in 2 minutes, by a syringe at -30°C. After stirring at -30°C for 10 min, the reaction mixture was slowly warmed to room temperature and stirred overnight. The reaction mixture was then quenched with an aqueous NH<sub>4</sub>Cl solution. The aqueous phase was extracted three times with CH<sub>2</sub>Cl<sub>2</sub>, the combined organic phases were washed with brine, dried (MgSO<sub>4</sub>) and concentrated under reduced pressure. The resulting crude product was purified by silica gel chromatography (2,2,4-trimethylpentane/acetone, 40/1-30/1) to yield alcohol **9** as a white powder (204 mg, 55%, *R<sub>f</sub>* 0.30, 2,2,4-trimethylpentane/acetone, 15/1), the protonation product **10** (142 mg, 38%, *R<sub>f</sub>* 0.85, 2,2,4-trimethylpentane) and diploptene (22 mg, 6%, *R<sub>f</sub>* 0.79, 2,2,4-trimethylpentane).

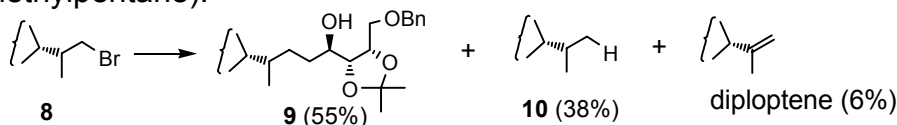

**m.p.:** 118-119°C;

**[ $\alpha$ ]<sup>22</sup><sub>D</sub>** +48.2 (C 1.09, CHCl<sub>3</sub>);

**<sup>1</sup>H NMR** (400 MHz, CDCl<sub>3</sub>):  $\delta$ /ppm = 7.40-7.35 (5H, m, ArH), 4.61 (2H, m, BnCH<sub>2</sub>), 4.39 (1H, ddd, *J*<sub>33,34</sub> = 5.3 Hz, *J*<sub>34,35a</sub> = 3.6 Hz, *J*<sub>34,35b</sub> = 9.4 Hz, 34-H), 4.03 (1H, dd, *J*<sub>32,33</sub> = 9.0 Hz, *J*<sub>33,34</sub> = 5.3 Hz, 33-H), 3.70 (1H, m, 35-H<sub>b</sub>), 3.67 (1H, m, 32-H), 3.59 (1H, d, *J*<sub>32,32-OH</sub> = 2.8 Hz, 32-OH), 3.47 (1H, dd, *J*<sub>34,35a</sub> = 3.6 Hz, *J*<sub>gem</sub> = 9.3 Hz, 35-H<sub>a</sub>), 1.39 and 1.36 (6H, d, acetal-Me),

0.99 (9H, m, 22-, 8 $\beta$ - and 14 $\alpha$ -Me), 0.89 (3H, s, 4 $\alpha$ -Me), 0.85 (3H, s, 10 $\beta$ -Me), 0.83 (3H, s, 4 $\beta$ -Me), 0.75 (3H, s, 18 $\alpha$ -Me), 1.12-1.92 (29H, m, hopane), 0.72-0.97 (3H, m, hopane);

$^{13}\text{C}$  NMR (101 MHz,  $\text{CDCl}_3$ ):  $\delta$ /ppm = 136.7, 128.6, 128.4, 128.2, 128.1, 108.4 (acetal-C), 80.8 (C-33), 75.4 (C-34), 73.9 (BnCH $_2$ ), 69.2 (C-32), 68.5 (C-35), 56.1 (C-5), 54.5 (C-17), 50.4 (C-9), 49.3 (C-13), 46.3 (C-21), 44.4 (C-18), 42.1 (C-3), 41.8 (C-14), 41.7 (C-8), 41.6 (C-19), 40.3 (C-1), 37.4 (C-10), 36.9 (C-22), 33.7 (C-15), 33.4 (C-24), 33.3 and 33.2 (C-4 and C-7), 31.1 (C-30), 30.9 (C-20), 28.1 (acetal-Me), 27.7 (C-31), 25.4 (acetal-Me), 24.0 (C-12), 22.8 (C-16), 21.6 (C-23), 20.9 (C-11), 20.0 (C-29), 18.7 (C-2 and C-6), 16.6 and 16.5 (C-26 and C-27), 15.9 (C-25 and C-28);

HRMS (DCI):  $m/z$  694.5766 [ $\text{M}+\text{NH}_4^+$ ], calcd for  $\text{C}_{45}\text{H}_{76}\text{O}_4\text{N}$ : 694.5774.

## II. Thioglycoside 12 synthetic scheme.

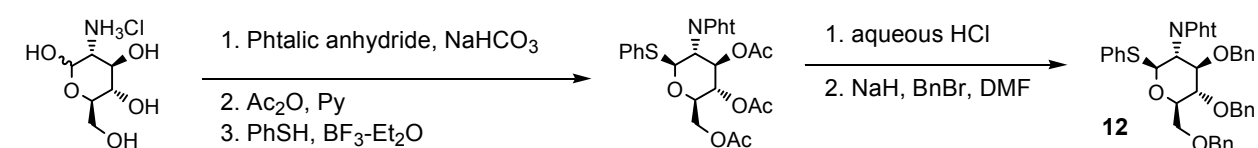

D-glucosamine  
hydrochloride

## III. Analytical data of final molecules.

Molecule numbering:

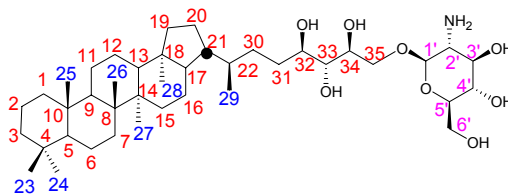

### Protected glycoside (11).

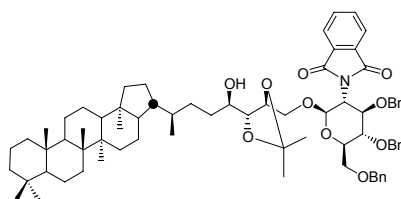

$^1\text{H}$  NMR (400 MHz,  $\text{CDCl}_3$ ):  $\delta$  6.90-7.69 (19H, m, ArH), 5.28 (1H, d,  $J_{1',2'} = 8.5$  Hz, 1'-H), 4.43-4.87 (6H, m, ArCH $_2$ ), 4.35 (1H, dd,  $J_{2',3'} = 10.7$  Hz,  $J_{3',4'} = 8.6$  Hz, 3'-H), 4.30 (1H, m, 34-H), 4.23 (1H, dd,  $J_{1',2'} = 8.5$  Hz,  $J_{2',3'} = 10.7$  Hz, 2'-H), 3.88 (1H, dd,  $J_{34,35a} = 3.3$  Hz,  $J_{\text{gem}} = 9.6$  Hz, 35-H $_a$ ), 3.85 (1H, m, 4'-H), 3.82 (2H, m, 6'-H $_a$  and 6'-H $_b$ ), 3.81 (1H, m, 33-H), 3.69 (1H, m, 5'-H), 3.62 (1H, m, 35-H $_b$ ), 3.33 (1H, m, 32-H), 2.62 (1H, d,  $J_{32,32\text{-OH}} = 3.0$  Hz, 32-OH), 1.29 and 1.27 (6H, 2s, acetal-Me), 0.99 and 0.98 (6H, 2s, 26- and 27-Me), 0.89 (3H, s, 24-Me), 0.86 (3H, s, 25-Me), 0.84 (3H, s, 23-Me), 0.80 (3H, d,  $J_{22,29} = 6.4$  Hz, 29R-Me), 0.70 (3H, s, 28-Me), 1.05-1.75 (27H, m, hopane), 0.63-0.95 (3H, m, hopane);

$^{13}\text{C}$  NMR (101 MHz):  $\delta$  137.8, 137.7, 133.6, 128.4, 128.0, 127.9, 127.8, 127.4, 123.3, 108.3 (acetal-C), 97.9 (C-1'), 80.5 (C-4'), 79.4 (C-33), 79.0 (C-3'), 75.1 (C-5'), 75.0 (ArCH<sub>2</sub>), 74.9 (C-34), 74.8 (ArCH<sub>2</sub>), 73.6 (ArCH<sub>2</sub>), 69.0 (C-32), 68.4 (C-6'), 67.3 (C-35), 56.1 (C-5), 55.5 (C-2'), 54.4 (C-17), 50.4 (C-9), 49.3 (C-13), 45.7 (C-21), 44.4 (C-18), 42.1 (C-3), 41.8 (C-14), 41.7 (C-8), 41.6 (C-19), 40.3 (C-1), 37.4 (C-10), 36.7 (C-22), 33.7 (C-15), 33.4 (C-23), 33.24 and 33.22 (C-4 and C-7), 30.4 (C-30), 30.2 (C-20), 28.1 and 25.4 (acetal-Me), 27.6 (C-31), 24.0 (C-12), 22.8 (C-16), 21.6 (C-23), 21.0 (C-11), 20.1 (C-29), 18.7 (C-2 and C-6), 16.6 and 16.5 (C-26 and C-27), 15.9 (C-25 and C-28);

HRMS(FAB):  $m/z$  1170.7003 [ $\text{M}+\text{Na}^+$ ], calcd for C<sub>73</sub>H<sub>97</sub>O<sub>10</sub>NNa: 1170.7010;

m.p.: 154.5-155°C;

$[\alpha]_D^{22} +33.0$  (C 0.58, CHCl<sub>3</sub>).

## Final Molecule (2).

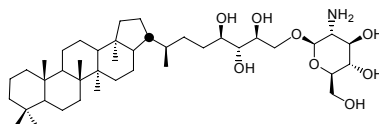

$^1\text{H}$  NMR (400 MHz, Pyridine-*d*<sub>5</sub>):  $\delta$  4.89 (1H, d,  $J_{1',2'} = 7.9$  Hz, 1'-H), 4.67 (1H, m, 34-H), 4.66 (1H, m, 35-H<sub>a</sub>), 4.58 (1H, m, 35-H<sub>b</sub>), 4.49 (1H, dd,  $J_{5',6'a} = 2.2$  Hz,  $J_{\text{gem}} = 11.7$  Hz, 6'-H<sub>a</sub>), 4.41 (1H, m, 32-H), 4.35 (1H, dd,  $J_{5',6'b} = 5.2$  Hz,  $J_{\text{gem}} = 11.7$  Hz, 6'-H<sub>b</sub>), 4.29 (1H, m, 33-H), 4.20 (1H, dd,  $J_{3',4'} = 9.2$  Hz,  $J_{4',5'} = 8.9$  Hz, 4'-H), 4.00 (1H, dd,  $J_{2',3'} = 8.9$  Hz,  $J_{3',4'} = 9.2$  Hz, 3'-H), 3.89 (1H, m, 5'-H), 3.30 (1H, brdd,  $J_{1',2'} = 7.9$  Hz,  $J_{2',3'} = 8.9$  Hz, 2'-H), 1.06 (3H, d,  $J_{22,29} = 5.5$  Hz, 29R-Me), 0.95 and 0.94 (6H, 2s, 26- and 27-Me), 0.87 (3H, s, 24-Me), 0.81 (6H, 2s, 25- and 23-Me), 0.70 (3H, s, 28-Me), 1.08-2.20 (27H, m, hopane), 0.70-0.91 (3H, m, hopane);

$^{13}\text{C}$  NMR (101 MHz, Pyridine-*d*<sub>5</sub>):  $\delta$  105.4 (C-1'), 78.5 (C-5'), 77.9 (C-3'), 75.3 (C-33), 73.6 (C-32), 73.3 (C-34), 73.1 (C-35), 71.5 (C-4'), 62.3 (C-6'), 58.5 (C-2'), 56.1 (C-5), 54.4 (C-17), 50.4 (C-9), 49.3 (C-13), 46.5 (C-21), 44.3 (C-18), 42.0 (C-3), 41.7 (C-14), 41.6 (C-8 and C-19), 40.2 (C-1), 37.3 (C-10), 37.0 (C-22), 33.7 (C-15), 33.3 (C-24), 33.1 (C-4 and C-7), 32.2 (C-30), 29.8 (C-20), 27.7 (C-31), 23.9 (C-12), 22.8 (C-16), 21.5 (C-23), 20.9 (C-11), 20.3 (C-29), 18.7 (C-2 and C-6), 16.5 and 16.4 (C-26 and C-27), 15.8 (C-25 and C-28);

HRMS (FAB<sup>+</sup>):  $m/z$  730.5232 [ $\text{M}+\text{Na}^+$ ], calcd for C<sub>41</sub>H<sub>73</sub>O<sub>8</sub>NNa: 730.5234;

$[\alpha]_D^{22} +8.4$  (C 0.38, THF/H<sub>2</sub>O 4/1).

## Final molecule's peracetate

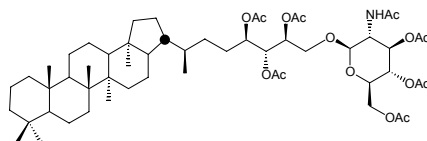

$^1\text{H}$  NMR (400 MHz, CDCl<sub>3</sub>):  $\delta$  5.89 (1H, d,  $J_{2',\text{NHAc}} = 8.3$  Hz, NHAc), 5.48 (1H, dd,  $J_{2',3'} = 10.5$  Hz,  $J_{3',4'} = 9.4$  Hz, 3'-H), 5.28 (1H, t,  $J_{32,33} = J_{33,34} = 5.1$  Hz, 33-H), 5.20 (1H, q,  $J_{33,34} = J_{34,35a} = J_{34,35b} = 5.1$  Hz, 34-H), 5.09 (1H, dd,  $J_{3',4'} = 9.4$  Hz,  $J_{4',5'} = 10.0$  Hz, 4'-H), 4.98 (1H, m, 32-H), 4.84 (1H, d,  $J_{1',2'} = 8.3$  Hz, 1'-H), 4.31 (1H, dd,  $J_{5',6'a} = 4.5$  Hz,  $J_{\text{gem}} = 12.3$  Hz, 6'-H<sub>a</sub>), 4.16 (1H, dd,  $J_{5',6'b} = 2.2$  Hz,  $J_{\text{gem}} = 12.3$  Hz, 6'-H<sub>b</sub>), 3.90 (2H, d,  $J_{34,35a} = J_{34,35b} = J_{\text{gem}} = 5.1$  Hz, 35-H<sub>a</sub> and 35-H<sub>b</sub>), 3.76 (1H, ddd,  $J_{4',5'} = 10.0$  Hz,  $J_{5',6'a} = 4.5$  Hz,  $J_{5',6'b} = 2.2$  Hz, 5'-H), 3.66 (1H, dt,  $J_{1',2'} = J_{2',\text{NHAc}} = 8.3$  Hz,  $J_{2',3'} = 10.5$  Hz, 2'-H), 2.12, 2.11, 2.11, 2.11, 2.06, 2.05 and 1.99 (21H, 7s, Ac), 0.97 (6H, s, 26- and 27-Me), 0.93 (3H, d,  $J_{22,29} = 6.5$  Hz, 29R-Me), 0.88 (3H, s, 24-Me), 0.84 (3H, s, 25-Me), 0.82 (3H, s, 23-Me), 0.71 (3H, s, 28-Me), 0.99-1.85 (27H, m, hopane), 0.71-0.95 (3H, m, hopane);

**<sup>13</sup>C NMR** (101 MHz, CDCl<sub>3</sub>):  $\delta$  170.8, 170.7, 170.6, 170.5, 170.2, 169.7 and 169.5 (Ac-C=O), 99.2 (C-1'), 72.1 (C-3'), 72.0 (C-32), 71.8 (C-5'), 71.3 (C-33), 69.9 (C-34), 68.6 (C-4'), 66.5 (C-35), 61.9 (C-6'), 56.1 (C-5), 55.0 (C-2'), 54.3 (C-17), 50.4 (C-9), 49.2 (C-13), 45.9 (C-21), 44.3 (C-18), 42.1 (C-3), 41.8 (C-14), 41.6 (C-8), 41.5 (C-19), 40.3 (C-1), 37.4 (C-10), 36.1 (C-22), 33.6 (C-15), 33.4 (C-24), 33.2 (C-4 and C-7), 30.7 (C-30), 27.6 (C-20), 25.9 (C-31), 23.9 (C-12), 23.2 (CH<sub>3</sub>CONH), 22.8 (C-16), 21.6 (C-23), 21.1 and 20.94 (CH<sub>3</sub>CO), 20.9 (C-11), 20.8, 20.74, 20.68 and 20.63 (CH<sub>3</sub>CO), 19.8 (C-29), 18.7 (C-2 and C-6), 16.6 and 16.5 (C-26 and C-27), 15.9 and 15.8 (C-25 and C-28);

**Mass** (DCI-NH<sub>3</sub>):  $m/z$  1001.6 [M<sup>+</sup>];

**m.p.** 192-193 °C;

**[ $\alpha$ ]<sub>D</sub><sup>22</sup>** +9.0 (C 0.71, CHCl<sub>3</sub>).
